# Supplementary material for: The β-hairpin of 40S exit channel protein Rps5/uS7 promotes efficient and accurate translation initiation in vivo
Source: eLife journal article supplement (doi:10.7554/elife.07939), 2015-07-02
Supplement: supp [file elife-07939-supp-v1.zip]

Archive with 9 entries (9 files):
- elife_poa_e07939_Figure_6_figure_supplement_1.pdf
- elife_poa_e07939_Supplementary_File_3.docx
- elife_poa_e07939_Figure_9_figure_supplement_1.pdf
- elife_poa_e07939_Figure_7_figure_supplement_1.pdf
- elife_poa_e07939_Figure_4_figure_supplement_2.pdf
- elife_poa_e07939_Supplementary_File_1.docx
- elife_poa_e07939_Figure_4_figure_supplement_1.pdf
- elife_poa_e07939_Supplementary_File_2.docx
- elife_poa_e07939_Supplementary_File_4.docx
