# Supplementary material for: The β-hairpin of 40S exit channel protein Rps5/uS7 promotes efficient and accurate translation initiation in vivo
Source: eLife journal article supplement (doi:10.7554/elife.07939), 2015-07-02
Supplement: supp [file elife-07939-supp-v1.zip › elife_poa_e07939_Figure_4_figure_supplement_1.pdf]

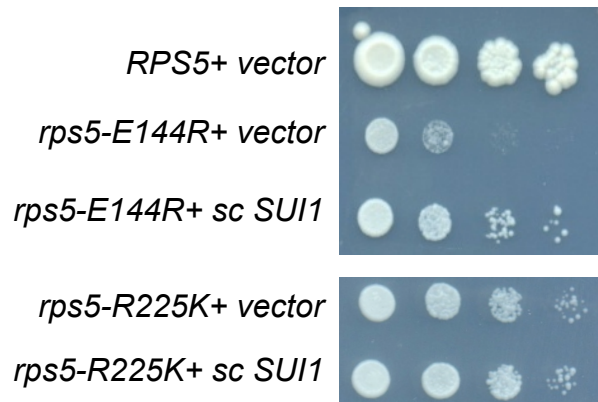

**Fig. 4-figure supplement 1. Increased *SUI1* gene dosage partially rescues the *Slg*<sup>-</sup> phenotype of *RPS5* mutations *E144R* and *R225K*.**

Ten-fold serial dilutions of transformants of strains containing the indicated *RPS5* alleles from Fig. 3A harboring sc *SUI1* plasmid pPMB21 or empty vector were spotted on SD+His+Ura and incubated at 30°C for 3da. All strains were spotted in parallel on plates of identical medium.
