# Supplementary material for: The β-hairpin of 40S exit channel protein Rps5/uS7 promotes efficient and accurate translation initiation in vivo
Source: eLife journal article supplement (doi:10.7554/elife.07939), 2015-07-02
Supplement: supp [file elife-07939-supp-v1.zip › elife_poa_e07939_Figure_4_figure_supplement_2.pdf]

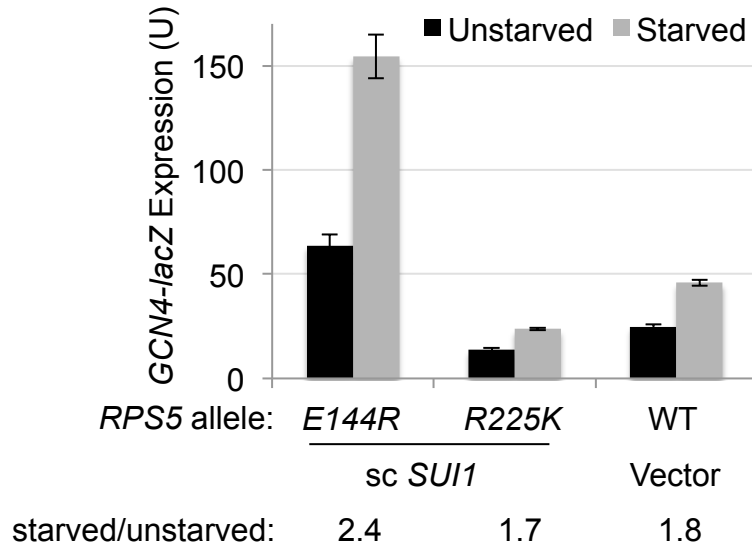

**Fig. 4-figure supplement 2. *RPS5* mutation *E144R* confers a *Gcd<sup>-</sup>* phenotype, derepressing *GCN4-lacZ* expression with restored *SUI1* dosage.**

Strains of the indicated *RPS5* genotype from Fig. 3A harboring either sc *SUI1* plasmid pPMB21 or empty vector, and the WT *GCN4-lacZ* reporter on plasmid p180, were cultured in duplicate sets in SD+His at 30°C. One set (unstarved) was cultured to  $A_{600}$  of ~1 and harvested. When the second set (starved) reached  $A_{600}$  of ~0.5, sulfometuron methyl (SM) was added to 0.5µg/ml and grown for 6h and harvested.  $\beta$ -galactosidase specific activities were measured in WCEs as described in Fig. 3B. Mean expression levels and S.E.M.s were calculated from four transformants.
