# Supplementary material for: The β-hairpin of 40S exit channel protein Rps5/uS7 promotes efficient and accurate translation initiation in vivo
Source: eLife journal article supplement (doi:10.7554/elife.07939), 2015-07-02
Supplement: supp [file elife-07939-supp-v1.zip › elife_poa_e07939_Figure_6_figure_supplement_1.pdf]

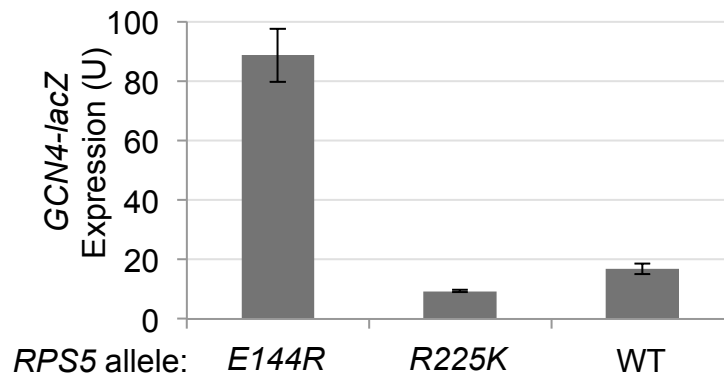

**Fig. 6-figure supplement 1. *RPS5* mutation *E144R* confers a *Gcd<sup>-</sup>* phenotype, derepressing *GCN4-lacZ* expression.**

Strains of the indicated *RPS5* genotype from Fig. 3A were transformed with p180 and analyzed for  $\beta$ -galactosidase expression as in Fig. 3B. Mean expression levels and S.E.M.s were calculated from four transformants.
