# Supplementary material for: The β-hairpin of 40S exit channel protein Rps5/uS7 promotes efficient and accurate translation initiation in vivo
Source: eLife journal article supplement (doi:10.7554/elife.07939), 2015-07-02
Supplement: supp [file elife-07939-supp-v1.zip › elife_poa_e07939_Figure_7_figure_supplement_1.pdf]

| <i>RPS5</i> strain | $\beta$ -galactosidase expression (U)                                             |                                                                                    |
|--------------------|-----------------------------------------------------------------------------------|------------------------------------------------------------------------------------|
|                    | 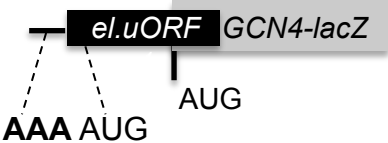 | 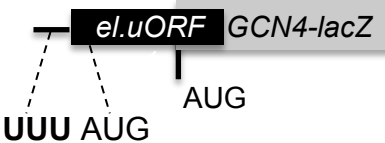 |
| WT                 | 1.0±0.04                                                                          | 1±0.23                                                                             |
| <i>A154R</i>       | 2.0±0.34                                                                          | 1.6±0.32                                                                           |
| <i>A155E</i>       | 1.1±0.08                                                                          | 1.4±0.26                                                                           |
| <i>R148A</i>       | 1.4±0.1                                                                           | 1.2±0.24                                                                           |
| <i>R156A</i>       | 1.3±0.1                                                                           | 1.4±0.3                                                                            |
| <i>R157A</i>       | 1.1±0.06                                                                          | 0.8±0.15                                                                           |
| <i>R148E</i>       | 1.1±0.06                                                                          | 0.9±0.16                                                                           |
| <i>R156E</i>       | 1.5±0.07                                                                          | 1.0±0.17                                                                           |
| <i>R157E</i>       | 1.0±0.08                                                                          | 0.7±0.12                                                                           |

**Fig. 7-figure supplement 1. Substitutions in the loop of the Rps5  $\beta$ -hairpin do not increase leaky scanning of GCN4 uAUG-1.**

Strains isogenic to those in Fig. 3A but containing the indicated *RPS5* alleles were transformed with the *el. uORF1 GCN4-lacZ* reporters containing optimum (pC3502) or poor (pC3503) contexts of uAUG-1 and analyzed for  $\beta$ -galactosidase activities as in Fig. 3B. Mean expression values were determined from four independent transformants and normalized to the value obtained for the WT strain, and the normalized means and S.E.M.s are reported.
