# Supplementary material for: The β-hairpin of 40S exit channel protein Rps5/uS7 promotes efficient and accurate translation initiation in vivo
Source: eLife journal article supplement (doi:10.7554/elife.07939), 2015-07-02
Supplement: supp [file elife-07939-supp-v1.zip › elife_poa_e07939_Figure_9_figure_supplement_1.pdf]

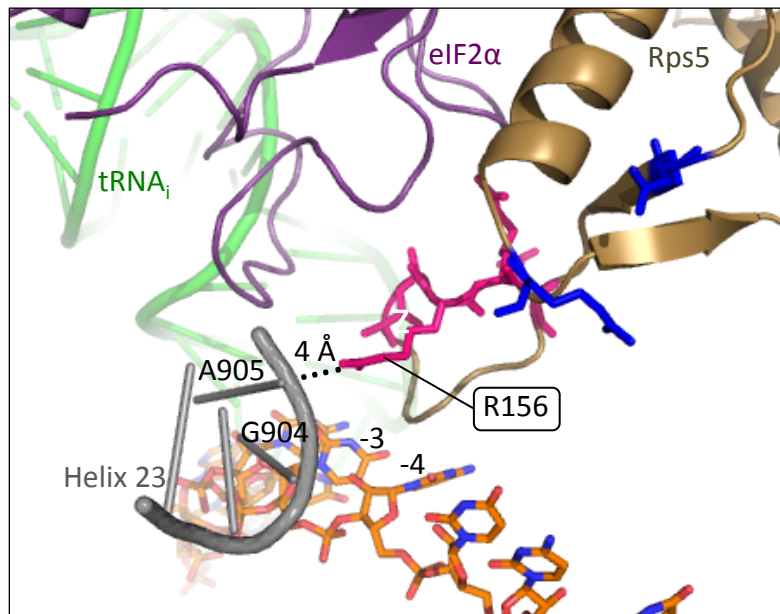

**Fig. 9-figure supplement 1. Rps5  $\beta$ -hairpin loop is in proximity to rRNA helix 23.**

Depiction of the py48S PIC (PDB 3J81) showing Rps5 in gold, mRNA in orange, Met-tRNA<sub>i</sub> in green, eIF2 $\alpha$  in purple and rRNA residues of helix 23 in grey. The backbone of helix 23 is  $\sim 4$  Å from Rps5 loop residue R156 (indicated by dotted line), and rRNA residue G904 is within 3.6 Å of the -3 nucleotide in the mRNA
