# Supplementary material for: The β-hairpin of 40S exit channel protein Rps5/uS7 promotes efficient and accurate translation initiation in vivo
Source: eLife journal article supplement (doi:10.7554/elife.07939), 2015-07-02
Supplement: supp [file elife-07939-supp-v1.zip › elife_poa_e07939_Supplementary_File_1.docx]

**Supplementary File 1. Phenotypes of *RPS5* mutants**

|  |  |  | Suppression of His+ phenotyped | | Suppression of *SUI5* Slg-e |
| --- | --- | --- | --- | --- | --- |
| *RPS5* allelea | Rel. growthb | Relative UUG:AUG  *HIS4-lacZ*  expressionc | *SUI3-2* | *SUI5* |
| WT | 4 | 1 | N | N | N |
| *E144A* | 3 | 1.3±0.003 | N |  |  |
| *E144R* | 1 | 5.9±0.02 | N |  |  |
| *E144A D145A* | 3 | 2.0±0.006 | N |  |  |
| *D145A* | 4 | 0.9±0.003 | N |  |  |
| *T146A T147A* | 4 | 0.7±0.001 | N |  |  |
| *R148A* | 4 | 0.8±0.002 | Y | Y | Y |
| *R148E* | 4 |  | Y | Y | Y |
| *G151R* | 4 | 0.8±0.002 | N |  |  |
| *G151S* | Lethal | - | - | - | - |
| *G152A* | 4 | 1.0±0.002 | N |  |  |
| *G152S* | 4 | 0.9±0.002 | N |  |  |
| *G152D* | 3 | 1.2±0.002 | N |  |  |
| *G152K* | 4 | 0.6±0.001 | N |  |  |
| *G153A* | 4 | 0.4±0.001 | Y | Y | Y |
| *G153K* | 3 | 1.4±0.002 | N |  |  |
| *A154T* | 4 | 0.9±0.003 | N |  |  |
| *A154R* | 4 | 0.3±0.001 | Y | Y | Y |
| *A155E* | 4 | 0.5±0.001 | Y | Y | Y |
| *A155V* | 4 | 0.7±0.004 | N |  |  |
| *A155R* | 4 | 0.7±0.001 | N |  |  |
| *R156A* | 4 | 0.7±0.002 | Y | Y | Y |
| *R156E* | 4 |  | Y | Y | Y |
| *R157A* | 4 | 0.9±0.004 | Y | Y | Y |
| *R157E* | 4 |  | Y | Y | Y |
| *Q158A* | 4 | 1.2±0.005 | N |  |  |
| *K222A* | 4 | 0.6±0.002 | Y | Y | Y |
| *S223A* | 2 | 2.0±0.008 | N |  |  |
| *N224A* | 4 | 1.2±0.008 | N |  |  |
| *R225K* | 2 | 3.6±0.005 | N |  |  |
| *R225E* | 2 | 2.9±0.005 | N |  |  |
| *R225A* | 3 | 2.8±0.006 | N |  |  |
| *E144R R225E* | 2 | 4.3±0.01 | N |  |  |

aIndicated*RPS5* alleles on lc *LEU2* vector pRS315.

bTransformants of strain JVY07 (*PGAL1-RPS5*) containing the indicated plasmid-borne *RPS5* alleles were streaked on SD+His+Ura+Trp and incubated at 30°C for 2da. Relative colony growth was judged qualitatively, with growth similar to the WT *RPS5* strain scored as 4 and very slow-growth scored as 1.

cRatio of expression of matched *HIS4-lacZ* reporters differing only at their start codons, UUG or AUG, measured as described in Figure 3B, and expressed relative to WT *RPS5* with the indicated S.E.M.s.

dAbility of the *RPS5* allele to suppress the His+ phenotype of *his4-301(ACG)* conferred by *SUI3-2* or *SUI5*, indicated as yes (Y) or no (N).

eAbility of the *RPS5* allele to suppress the Slg- phenotype conferred by *SUI5*, indicated as yes (Y) or no (N).
